# Supplementary material for: Irx1 mechanisms for oral epithelial basal stem cell plasticity during reepithelialization after injury
Source: JCI journal article supplement (doi:10.1172/jci.insight.179815), 2025-01-08
Supplement: sd2 [file 2]

# Irx1 Western Blots from 5-14-24

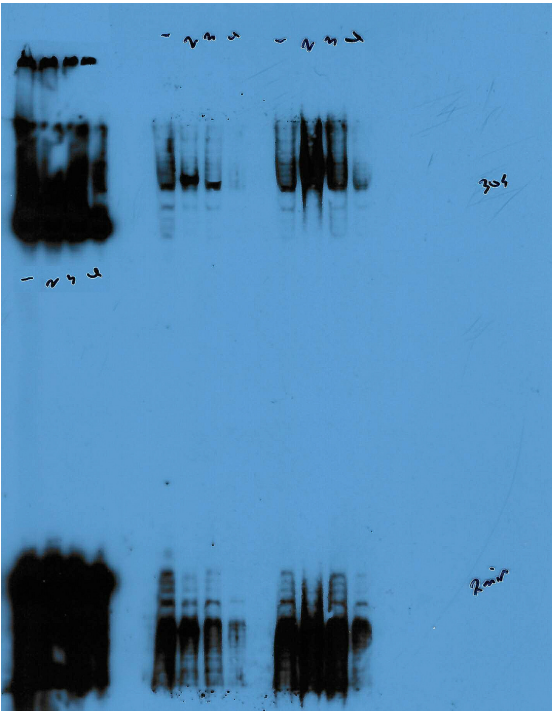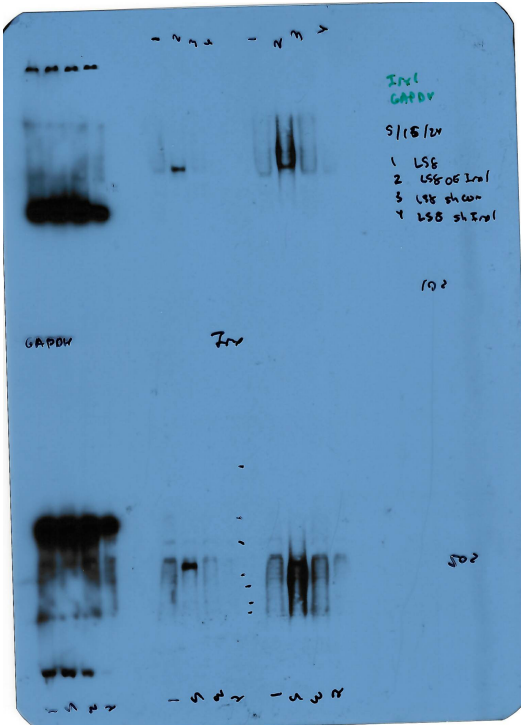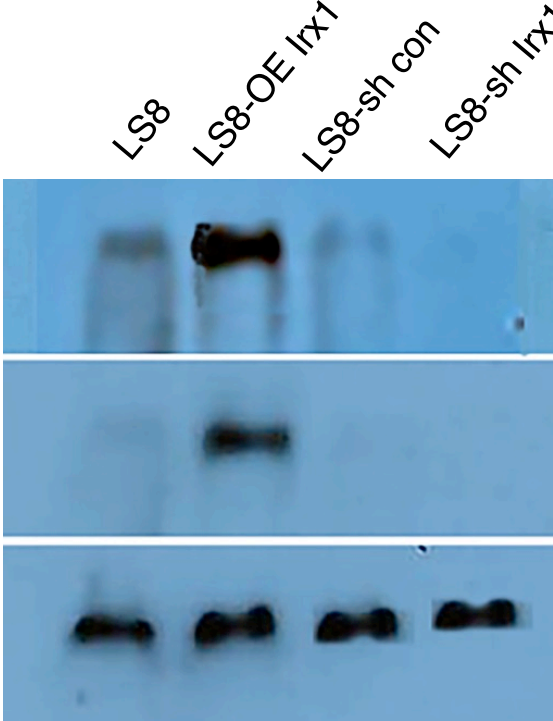

Irx1 30 sec

Irx1 10sec

Gapdh 2 sec
